# Supplementary material for: Factors Associated With Diabetes Care Quality Among Patients With Schizophrenia in Ontario, Canada
Source: Atypon-hosted journal article supplement (doi:10.1176/appi.ps.201900009), 2019-11-20
Supplement: appi.ps.201900009.ds001.pdf [file appi.ps.201900009.ds001.pdf]

Supplementary Table S1: Baseline characteristics of patients in Ontario, Canada with diabetes and schizophrenia on April 1, 2011

|                                                            | N         | %    |
|------------------------------------------------------------|-----------|------|
| <b>Total patients</b>                                      | 26259     |      |
| <b>Demographic characteristic:</b>                         |           |      |
| Age, mean±SD                                               | 58.8±14.6 |      |
| Male                                                       | 12287     | 46.8 |
| Rural residence                                            | 2388      | 9.1  |
| Ethnic concentration score, mean±SD*                       | .52±.9    |      |
| Income quintile                                            |           |      |
| 1                                                          | 9237      | 35.2 |
| 2                                                          | 5630      | 21.4 |
| 3                                                          | 4400      | 16.8 |
| 4                                                          | 3716      | 14.2 |
| 5                                                          | 2971      | 11.3 |
| <b>Illness characteristics:</b>                            |           |      |
| Duration of diabetes in years, mean±SD                     | 8.2±5.7   |      |
| Duration of schizophrenia in years, mean±SD                | 10.6±6.5  |      |
| ADG comorbidity score, mean±SD                             | 5.5±3.6   |      |
| <b>Health service use in past year:</b>                    |           |      |
| Primary care visits for mental health reasons, mean±SD     | 1.7±4.5   |      |
| Number of visits: 0                                        | 15605     | 59.4 |
| 1-2                                                        | 6038      | 23.0 |
| 3+                                                         | 4616      | 17.6 |
| Primary care visits for non-mental health reasons, mean±SD | 8.2±10.4  |      |
| Number of visits: 0                                        | 3013      | 11.5 |
| 1-2                                                        | 3851      | 14.7 |
| 3+                                                         | 19395     | 73.9 |
| Outpatient psychiatrist visits, mean±SD                    | 2.6±5.7   |      |
| Number of visits: 0                                        | 15518     | 59.1 |
| 1-2                                                        | 3124      | 11.9 |
| 3+                                                         | 7617      | 29.0 |
| ED visits for mental health reasons, mean±SD               | 0.3±1.4   |      |
| Number of visits: 0                                        | 22629     | 86.2 |
| 1-2                                                        | 2805      | 10.7 |
| 3+                                                         | 825       | 3.1  |
| ED visits for non-mental health reasons, mean±SD           | 1.1±3.1   |      |
| Number of visits: 0                                        | 16067     | 61.2 |
| 1-2                                                        | 6993      | 26.6 |
| 3+                                                         | 3199      | 12.2 |
| Mental health hospitalizations, mean±SD                    | 0.2±0.6   |      |

|                                             |         |      |
|---------------------------------------------|---------|------|
| Number of visits: 0                         | 23758   | 90.5 |
| 1-2                                         | 2183    | 8.3  |
| 3+                                          | 318     | 1.2  |
| Non-mental health hospitalizations, mean±SD | 0.2±0.8 |      |
| Number of visits: 0                         | 22221   | 84.6 |
| 1-2                                         | 3542    | 13.5 |
| 3+                                          | 496     | 1.9  |

\* This aggregate measure refers to high area-level concentrations of recent immigrants and people belonging to a 'visible minority' group. Specific ethnic compositions were not available in this database

Supplementary Table S2: Sensitivity analysis after excluding patients receiving primary care only from a psychiatrist (n = 25,628)

| Co-variate                                            | Optimal tests (3 vs <3) |           | Any tests (1+ vs 0) |           |
|-------------------------------------------------------|-------------------------|-----------|---------------------|-----------|
|                                                       | OR                      | 95% CI    | OR                  | 95% CI    |
| <b>Demographic characteristic:</b>                    |                         |           |                     |           |
| Male (reference: female)                              | .95                     | .89-1.0   | .88                 | .82-.95   |
| Age (reference: 55-64)                                |                         |           |                     |           |
| 18-24                                                 | .39                     | .23-.66   | .36                 | .25-.52   |
| 25-34                                                 | .54                     | .44-.65   | .48                 | .40-.57   |
| 35-44                                                 | .71                     | .64-.79   | .69                 | .61-.79   |
| 45-54                                                 | .84                     | .77-.91   | .90                 | .81-1.00  |
| 65-74                                                 | .99                     | .91-1.07  | 1.16                | 1.02-1.31 |
| 75-84                                                 | .67                     | .60-.74   | .78                 | .68-.89   |
| Income deprivation score quintile (reference: 1)      |                         |           |                     |           |
| 2                                                     | 1.04                    | .94-1.15  | .81                 | .70-.94   |
| 3                                                     | 1.14                    | 1.02-1.28 | .81                 | .69-.94   |
| 4                                                     | .91                     | .82-.99   | .59                 | .46-.74   |
| 5                                                     | .81                     | .65-1.00  | .58                 | .46-.74   |
| Rural vs urban residence                              | 1.00                    | .90-1.12  | .96                 | .84-1.09  |
| <b>Illness characteristics:</b>                       |                         |           |                     |           |
| ADG comorbidity score (reference: 0)                  |                         |           |                     |           |
| 1                                                     | 2.91                    | 2.17-3.90 | 3.17                | 2.65-3.78 |
| 2+                                                    | 3.64                    | 2.77-4.79 | 4.43                | 3.78-5.18 |
| Diabetes duration in years (reference: 0-5)           |                         |           |                     |           |
| 6-10                                                  | 1.19                    | 1.10-1.28 | 1.06                | .97-1.16  |
| 11-15                                                 | 1.46                    | 1.34-1.59 | 1.08                | .97-1.20  |
| 16-20                                                 | 1.57                    | 1.44-1.71 | 1.27                | 1.13-1.43 |
| <b>Health service use in past year:</b>               |                         |           |                     |           |
| Outpatient psychiatry visits (reference: 0)           |                         |           |                     |           |
| 1-2                                                   | 1.11                    | 1.01-1.22 | 1.18                | 1.04-1.33 |
| 3+                                                    | 1.26                    | 1.18-1.35 | 1.44                | 1.31-1.59 |
| Emergency visits for mental health (reference: 0)     |                         |           |                     |           |
| 1-2                                                   | .76                     | .67-.86   | .82                 | .71-.94   |
| 3+                                                    | .67                     | .54-.84   | .65                 | .52-.82   |
| Emergency visits for non-mental health (reference: 0) |                         |           |                     |           |
| 1-2                                                   | 1.01                    | .94-1.09  | 1.02                | .93-1.13  |
| 3+                                                    | .95                     | .85-1.06  | 1.05                | .91-1.20  |
| Hospitalizations for mental health (reference: 0)     |                         |           |                     |           |

|                                                          |     |     |          |     |         |
|----------------------------------------------------------|-----|-----|----------|-----|---------|
|                                                          | 1-2 | .99 | .86-1.13 | .82 | .70-.96 |
|                                                          | 3+  | .73 | .51-1.05 | .69 | .50-.95 |
| Hospitalizations for non-mental health<br>(reference: 0) |     |     |          |     |         |
|                                                          | 1-2 | .89 | .81-.98  | .76 | .68-.86 |
|                                                          | 3+  | .67 | .52-.86  | .55 | .42-.71 |

Supplementary Table S3: Sensitivity analysis after excluding patients hospitalized during the study period (n = 14,530)

| Co-variate                                               | Optimal tests (3 vs <3) |           | Any tests (1+ vs 0) |           |
|----------------------------------------------------------|-------------------------|-----------|---------------------|-----------|
|                                                          | OR                      | 95% CI    | OR                  | 95% CI    |
| <b>Demographic characteristic:</b>                       |                         |           |                     |           |
| Male (reference: female)                                 | .95                     | .88-1.03  | .87                 | .79-.96   |
| Age (reference: 55-64)                                   |                         |           |                     |           |
| 18-24                                                    | .31                     | .15-.64   | .26                 | .16-.40   |
| 25-34                                                    | .60                     | .47-.75   | .50                 | .41-.62   |
| 35-44                                                    | .74                     | .65-.85   | .77                 | .66-.90   |
| 45-54                                                    | .81                     | .73-.90   | .93                 | .82-1.07  |
| 65-74                                                    | .98                     | .87-1.11  | 1.12                | .95-1.32  |
| 75-84                                                    | .64                     | .55-.74   | .76                 | .63-.91   |
| Income deprivation score quintile (reference: 1)         |                         |           |                     |           |
| 2                                                        | 1.05                    | .91-1.21  | .82                 | .69-.98   |
| 3                                                        | 1.23                    | 1.05-1.43 | .81                 | .67-.99   |
| 4                                                        | .91                     | .80-1.03  | .72                 | .61-.85   |
| 5                                                        | .91                     | .68-1.22  | .46                 | .34-.62   |
| Rural vs urban residence                                 | .99                     | .85-1.15  | 1.01                | .85-1.20  |
| <b>Illness characteristics:</b>                          |                         |           |                     |           |
| ADG comorbidity score (reference: 0)                     |                         |           |                     |           |
| 1                                                        | 3.31                    | 2.33-4.71 | 3.33                | 2.73-4.07 |
| 2+                                                       | 3.93                    | 2.81-5.49 | 3.95                | 3.30-4.73 |
| Diabetes duration in years (reference: 0-5)              |                         |           |                     |           |
| 6-10                                                     | 1.10                    | 1.00-1.22 | 1.03                | .92-1.16  |
| 11-15                                                    | 1.40                    | 1.25-1.57 | 1.01                | .88-1.16  |
| 16-20                                                    | 1.35                    | 1.19-1.53 | 1.13                | .97-1.31  |
| <b>Health service use in past year:</b>                  |                         |           |                     |           |
| Primary care visits for mental health (reference: 0)     |                         |           |                     |           |
| 1-2                                                      | .95                     | .86-1.04  | 1.13                | 1.00-1.27 |
| 3+                                                       | .77                     | .69-.87   | .99                 | .87-1.14  |
| Primary care visits for non-mental health (reference: 0) |                         |           |                     |           |
| 1-2                                                      | 1.14                    | .93-1.39  | 1.70                | 1.45-1.99 |
| 3+                                                       | 2.33                    | 1.96-2.77 | 3.67                | 3.18-4.23 |
| Outpatient psychiatry visits (reference: 0)              |                         |           |                     |           |
| 1-2                                                      | 1.11                    | .97-1.26  | 1.26                | 1.08-1.46 |
| 3+                                                       | 1.30                    | 1.18-1.42 | 1.52                | 1.35-1.72 |

|                                                          |      |          |      |          |
|----------------------------------------------------------|------|----------|------|----------|
| Emergency visits for mental health<br>(reference: 0)     |      |          |      |          |
| 1-2                                                      | .77  | .64-.93  | .85  | .70-1.04 |
| 3+                                                       | .53  | .34-.83  | .54  | .37-.78  |
| Emergency visits for non-mental health<br>(reference: 0) |      |          |      |          |
| 1-2                                                      | 1.01 | .91-1.12 | 1.00 | .89-1.14 |
| 3+                                                       | .93  | .78-1.12 | .89  | .73-1.09 |

Supplementary Table S4: Sensitivity analysis after excluding patients whose physicians were not practicing in a representative manner (n = 23,059)

| Co-variate                                               | Optimal tests (3 vs <3) |           | Any tests (1+ vs 0) |           |
|----------------------------------------------------------|-------------------------|-----------|---------------------|-----------|
|                                                          | OR                      | 95% CI    | OR                  | 95% CI    |
| <b>Demographic characteristic:</b>                       |                         |           |                     |           |
| Male (reference: female)                                 | .98                     | .91-1.03  | .93                 | .86-1.01  |
| Age (reference: 55-64)                                   |                         |           |                     |           |
| 18-24                                                    | .35                     | .20-.62   | .31                 | .21-.47   |
| 25-34                                                    | .53                     | .44-.65   | .46                 | .38-.55   |
| 35-44                                                    | .70                     | .63-.79   | .63                 | .55-.73   |
| 45-54                                                    | .83                     | .76-.90   | .85                 | .75-.95   |
| 65-74                                                    | 1.0                     | .91-1.09  | 1.2                 | 1.04-1.38 |
| 75-84                                                    | .68                     | .61-.76   | .79                 | .68-.92   |
| Income deprivation score quintile (reference: 1)         |                         |           |                     |           |
| 2                                                        | 1.03                    | .93-1.14  | .85                 | .73-.99   |
| 3                                                        | 1.16                    | 1.03-1.30 | .89                 | .76-1.05  |
| 4                                                        | .95                     | .86-1.04  | .87                 | .76-1.00  |
| 5                                                        | .89                     | .72-1.12  | .76                 | .57-1.01  |
| Rural vs urban residence                                 | 1.16                    | 1.03-1.30 | 1.11                | 0.95-1.30 |
| <b>Illness characteristics:</b>                          |                         |           |                     |           |
| ADG comorbidity score (reference: 0)                     |                         |           |                     |           |
| 1                                                        | 2.85                    | 1.95-4.17 | 2.59                | 2.07-3.23 |
| 2+                                                       | 3.29                    | 2.28-4.74 | 3.46                | 2.83-4.24 |
| Diabetes duration in years (reference: 0-5)              |                         |           |                     |           |
| 6-10                                                     | 1.20                    | 1.12-1.30 | 1.05                | .95-1.15  |
| 11-15                                                    | 1.49                    | 1.37-1.63 | 1.08                | .95-1.21  |
| 16-20                                                    | 1.59                    | 1.36-1.75 | 1.31                | 1.15-1.50 |
| <b>Health service use in past year:</b>                  |                         |           |                     |           |
| Primary care visits for mental health (reference: 0)     |                         |           |                     |           |
| 1-2                                                      | .96                     | .89-1.04  | 1.09                | .99-1.21  |
| 3+                                                       | .83                     | .77-.91   | .97                 | .87-1.09  |
| Primary care visits for non-mental health (reference: 0) |                         |           |                     |           |
| 1-2                                                      | 1.23                    | 1.03-1.47 | 1.57                | 1.35-1.82 |
| 3+                                                       | 2.51                    | 2.14-2.95 | 3.30                | 2.88-3.78 |
| Outpatient psychiatry visits (reference: 0)              |                         |           |                     |           |
| 1-2                                                      | 1.15                    | 1.04-1.27 | 1.26                | 1.11-1.44 |
| 3+                                                       | 1.28                    | 1.20-1.37 | 1.59                | 1.43-1.76 |
| Emergency visits for mental health (reference: 0)        |                         |           |                     |           |

|                                                          |     |      |          |      |          |
|----------------------------------------------------------|-----|------|----------|------|----------|
|                                                          | 1-2 | .78  | .69-.89  | .85  | .73-.99  |
|                                                          | 3+  | .67  | .53-.85  | .64  | .50-.83  |
| Emergency visits for non-mental health<br>(reference: 0) |     |      |          |      |          |
|                                                          | 1-2 | 1.00 | .93-1.08 | 0.96 | .87-1.07 |
|                                                          | 3+  | .95  | .84-1.06 | 1.00 | .85-1.16 |
| Hospitalizations for mental health<br>(reference: 0)     |     |      |          |      |          |
|                                                          | 1-2 | .96  | .83-1.10 | .75  | .63-.88  |
|                                                          | 3+  | .77  | .54-1.12 | .69  | .48-.99  |
| Hospitalizations for non-mental health<br>(reference: 0) |     |      |          |      |          |
|                                                          | 1-2 | .90  | .82-1.0  | .76  | .67-.87  |
|                                                          | 3+  | .66  | .51-.86  | .57  | .43-.76  |



Supplementary Content S5: Health service system characteristics of Ontario, Canada

- Publicly funded single payer system for physician/hospital services and medically indicated diagnostic testing
- Physicians work in independent and group practices (i.e. health centers, hospital-based departments or primary health care teams)
- Majority of health care, including mental health, is provided by primary care services (i.e. general practitioners, family physicians, nurse practitioners)
- Coordination of care is generally decentralized with primary care providers referring to specialists (i.e. psychiatrists)
- Outpatient psychiatrists may work as a consultant to primary care physicians or assume mental health care for short of long term follow up

Source: Lin E, Goering P, Offord DR, Campbell D, Boyle MH. The use of mental health services in Ontario: epidemiologic findings. *The Canadian Journal of Psychiatry*. 1996 Nov;41(9):572-7.
